# Supplementary material for: Amplification of Long Noncoding RNA ZFAS1 Promotes Metastasis in Hepatocellular Carcinoma
Source: Oxford University Press journal article supplement (doi:10.1158/0008-5472.can-14-3721), 2015-06-11
Supplement: 00085472can143721-sup-142634_2_supp_3000588_np67gc.docx [file 00085472can143721-sup-142634_2_supp_3000588_np67gc.docx]

**Supplementary data**


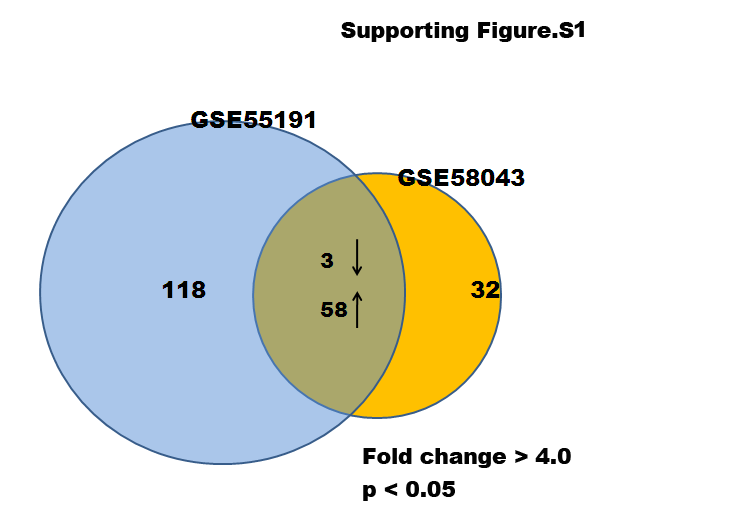


**Supporting Figure.S1. Differentially expressed lncRNAs between HCC tissues and pair non-tumor tissues.**

We developed a Venn analysis to screen the consistently upregulated or downregulated lncRNAs in GSE58043 and GSE55191. Analysis of these data showed that 3 lncRNAs were consistently downregulated and 58 lncRNAs were consistently upregulated in HCC tissues (fold change>4.0, *p*<0.05).


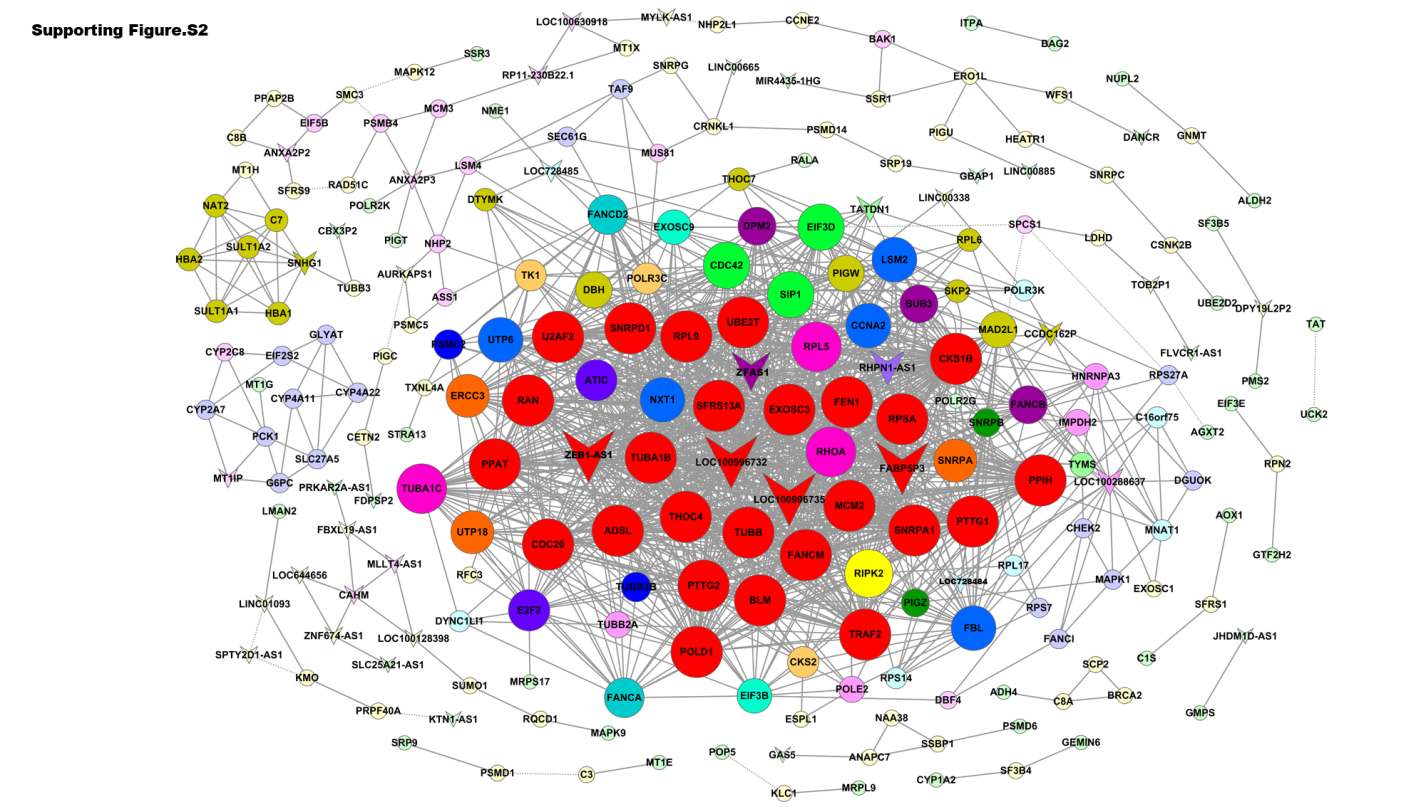


**Supporting Figure.S2. Co-expression network analysis.**

Co-expression network analysis was performed to identify core lncRNAs in HCC.

Within the network analysis, degree centrality is the most simplest and important measures of the centrality of a gene within a network that determine the relative importance. Degree centrality is defined as the link numbers one node has to the other.


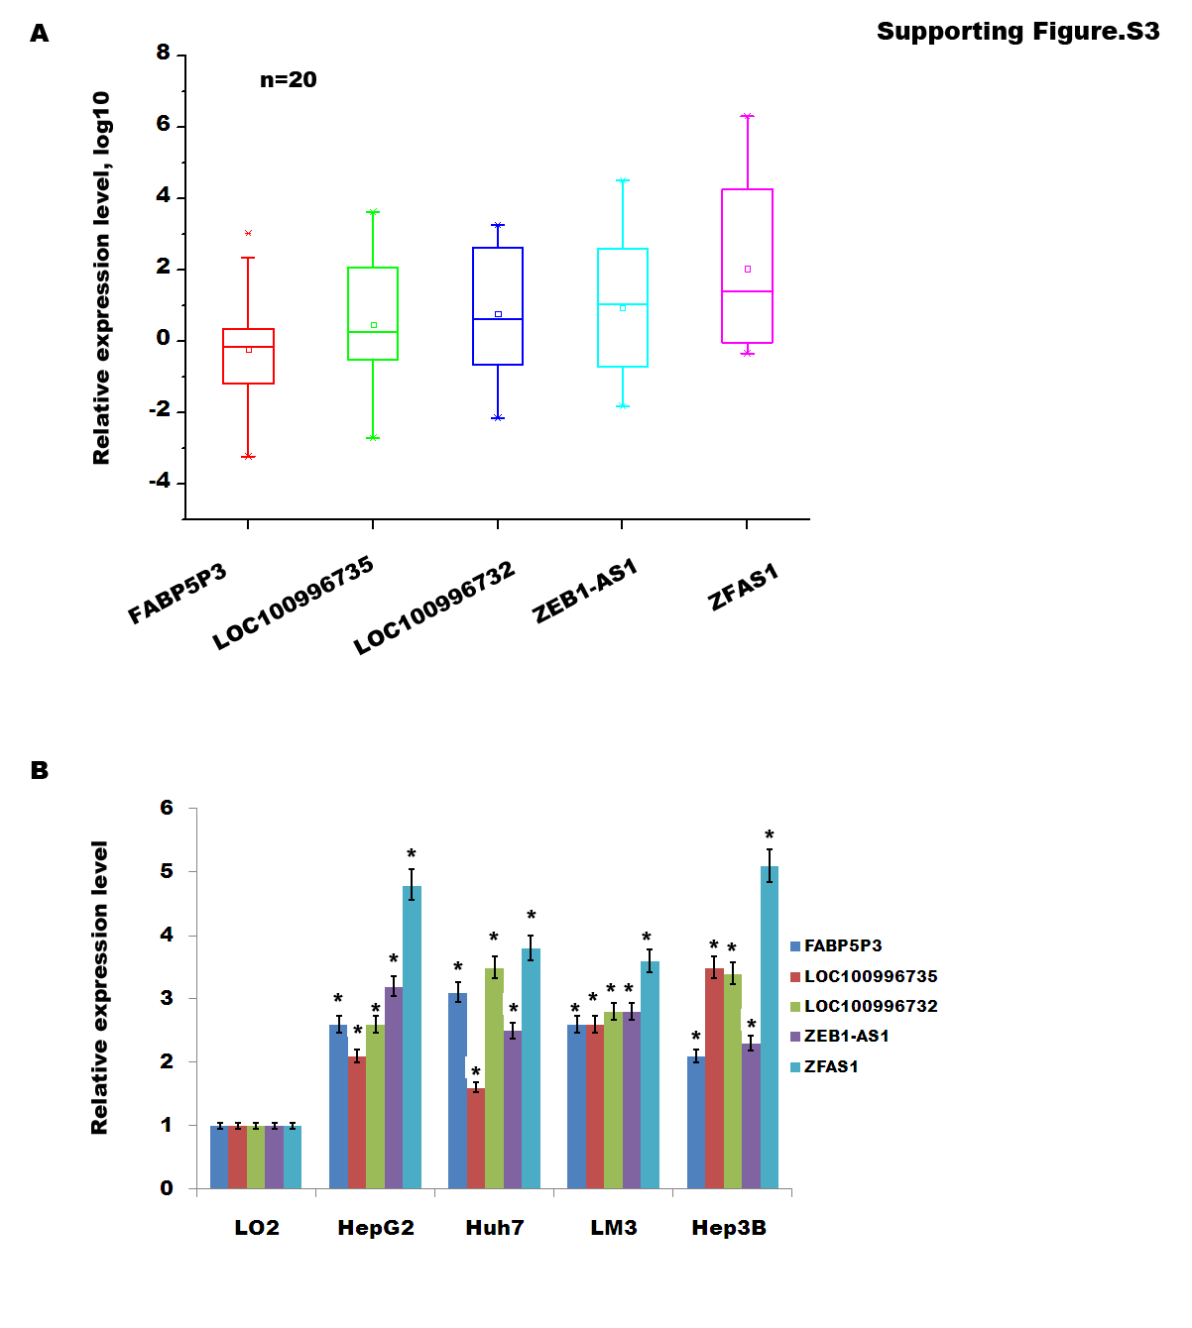


**Supporting Figure.S3. qPCR analysis of lncRNAs.**

(A) To validate the microarray analysis findings, we analyzed their expression using qPCR in 20 pairs of HCC and pair non-tumor tissues. Of these five lncRNAs, ZFAS1 is the most upregulated lncRNA in HCC tissues. Relative expression was calculated with respect to a healthy control tissue. (B) qPCR analysis of lncRNA expression level in HCC cell lines. * *p*<0.05.


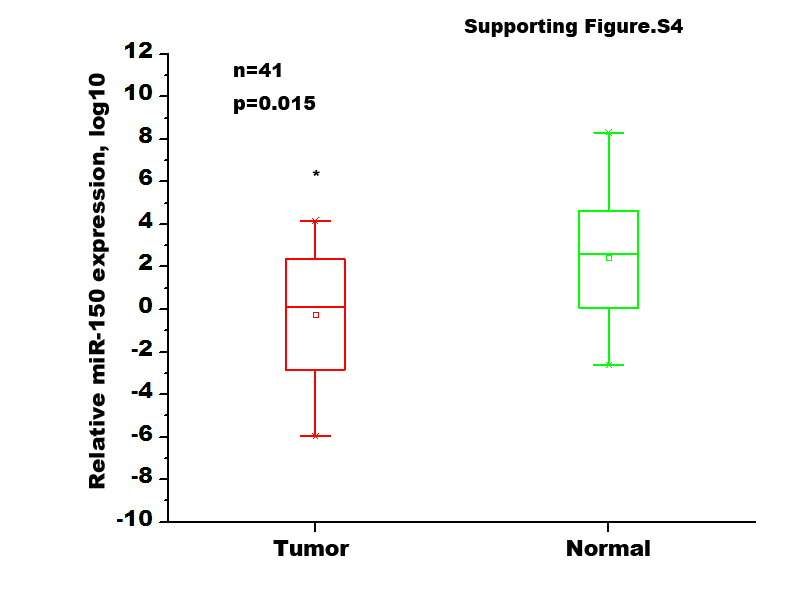


**Supporting Figure.S4. qPCR analysis of miR-150 in HCC.**

qPCR analysis of miR-150 expression level in 41 HCC tissues and pair non-tumor tissues. Relative miR-150 expression in every sample was calculated with respect to an indicated specimen. The results were expressed as Log10 (2–ΔΔCt).


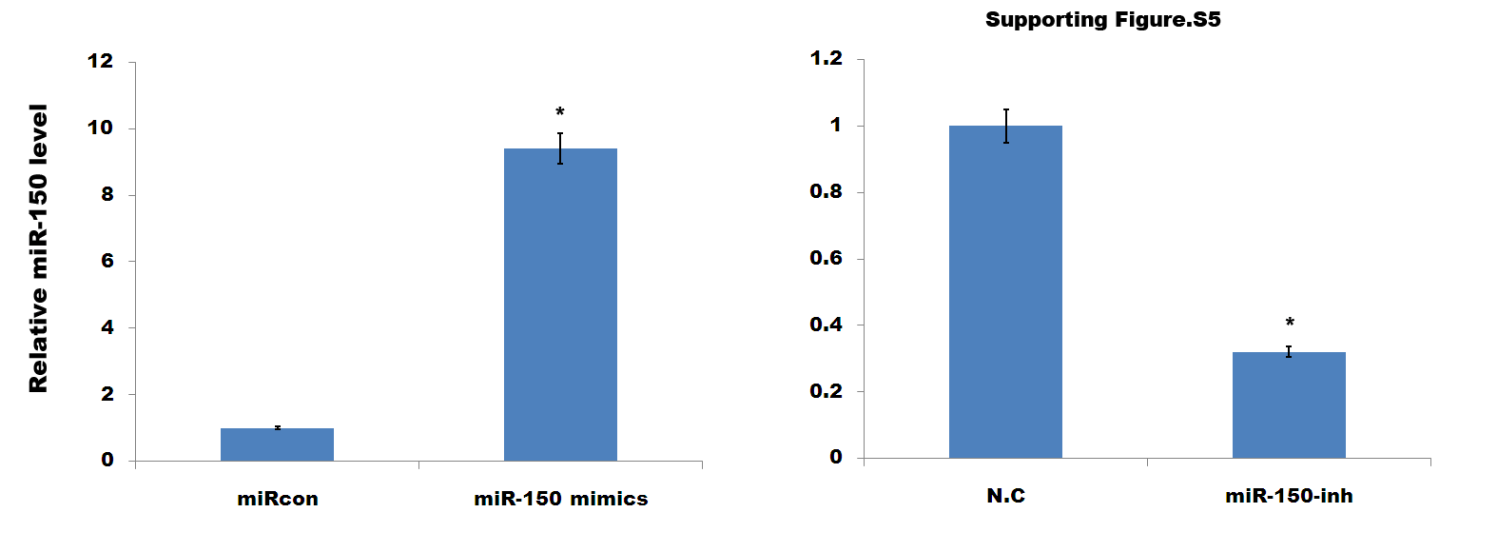


**Supporting Figure.S5. qPCR analysis of miR-150.**

qPCR analysis of miR-150 expression level in Huh7 cells after overexpression or knockdown of miR-150. * *p*<0.05.

**
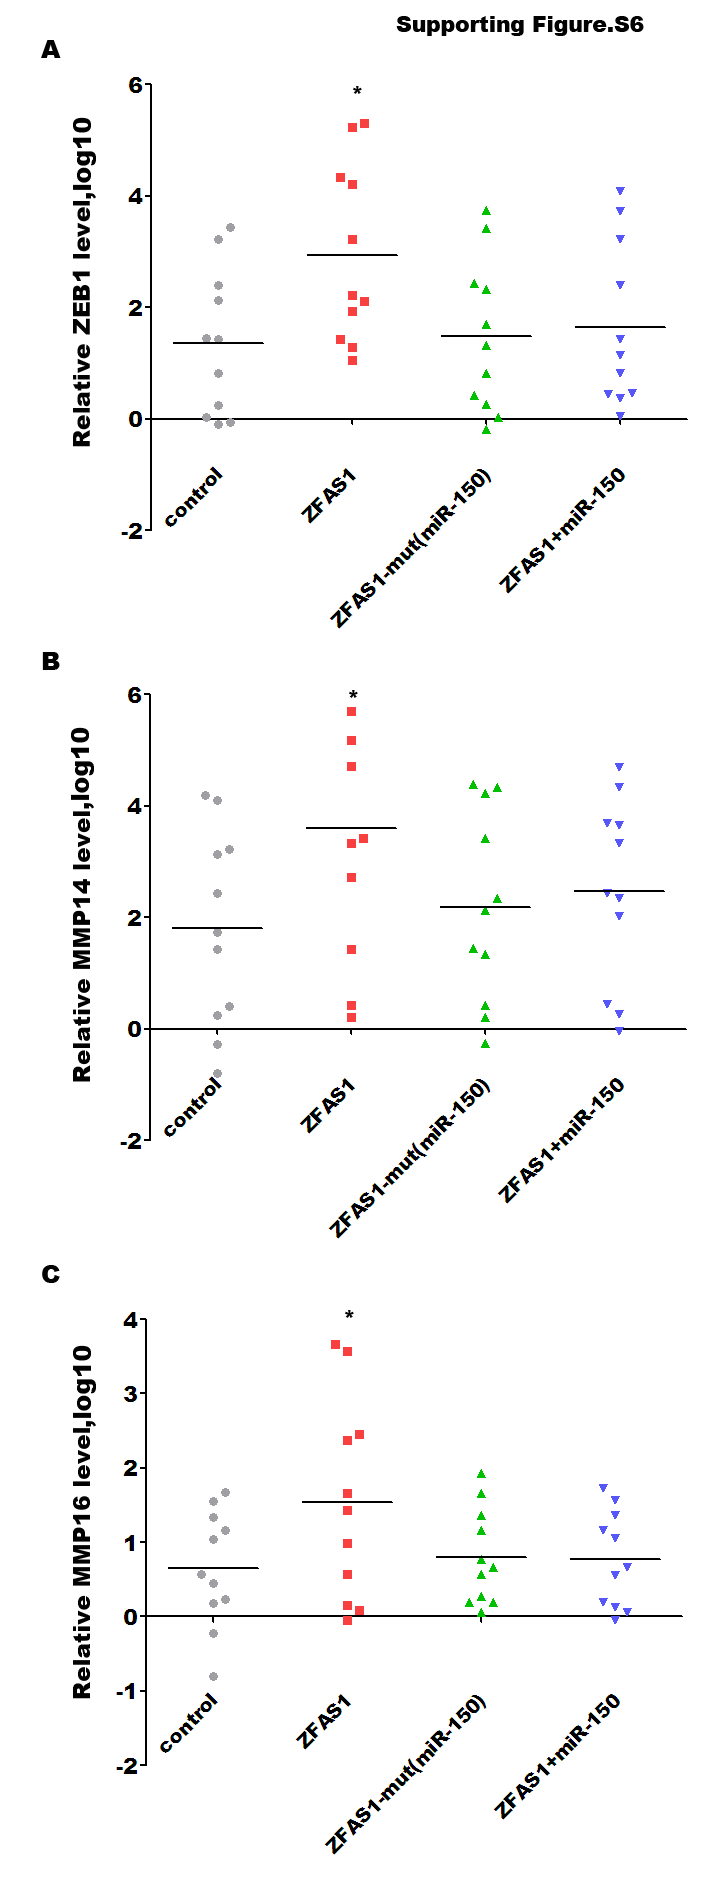
**

**Supporting Figure.S6. ZFAS1 positively regulates ZEB1, MMP14 and MMP16 expression *in vivo*.**

qPCR analysis of ZEB1 (A), MMP14 (B) and MMP16 (C) after ZFAS1 overexpression in mice. **p* < 0.05.

**Supporting Table.S1. qPCR primers and siRNA sequences used in the study.**

| siRNA-ZFAS1  *siRNA1-sense*  *siRNA1-antisense* | UCCAAAAUCCAUUCUGUACCC  GUACAGAAUGGAUUUUGGAAG |
| --- | --- |
| *siRNA2- sense*  *siRNA2- antisense*  *siRNA3- sense*  *siRNA3- antisense*  miR-150 mimic  2'-O-methyl-miR-150 inhibitor  **qPCR primers:**  ZFAS1  forward  reverse  miR-150  reverse transcription  forward  reverse  ZEB1  forward  reverse  MMP14  forward  reverse  MMP16  forward  reverse | AAUCAAAGCCUGGUUUUGGCC  CCAAAACCAGGCUUUGAUUGA  AUAUAUAUAUUCUACUUCCAA  GGAAGUAGAAUAUAUAUAUAC  UCUCCCAACCCUUGUACCAGUG  CACUGGUACAAGGGUUGGGAGA  ACGTGCAGACATCTACAACCT  TACTTCCAACACCCGCAT  GTCGTATCCAGTGCAGGGTCCGAGGTATTCGCACTGGATACGACcactg  UCUCCCAACCCUUGUAC  GTGCAGGGTCCGAGGT  TTCTCACACTCTGGGTCTTATTC  TTCTTCCATCTCTTTATCCTCCT  TGGACTGTCAGGAATGAGGAT  CATAGGTGGGGTTTTTGGGT  CCCACACCGCTCTATTCCTCC  CCCTGTTGTTTCTCACTCGCC |

**Supporting Table.S2. Consistently upregulated or downregulated lncRNAs in GSE55191 and GSE58043 (Fold change>4.0, p<0.05).**

| ProbeID | BlastToHuman | GeneType | Strand | type | GeneSymbol | source | RNAlength | chrom | strand | Style |
| --- | --- | --- | --- | --- | --- | --- | --- | --- | --- | --- |
| ASHG19A3A007120 | ref|NR_003098| | miscRNA | - | noncoding | SNHG1 | RefSeq_NR | 1134 | chr11 | - | up |
| ASHG19A3A007101 | ref|NR_002578| | miscRNA | - | noncoding | GAS5 | RefSeq_NR | 651 | chr1 | - | up |
| ASHG19A3A007614 | ref|NR_028038| | miscRNA | - | noncoding | GATS | RefSeq_NR | 3562 | chr7 | - | up |
| ASHG19A3A011314 | ref|NR_001587| | miscRNA | - | noncoding | AURKAPS1 | RefSeq_NR | 1537 | chr1 | - | up |
| ASHG19A3A044017 | ref|NR_001446| | miscRNA | + | noncoding | ANXA2P3 | Ensembl | 1008 | chr10 | + | up |
| ASHG19A3A036117 | ref|NR_027427| | miscRNA | - | noncoding | TATDN1 | RefSeq_NR | 1158 | chr8 | - | up |
| ASHG19A3A029662 | ref|NR_024052| | miscRNA | - | noncoding | HCG18 | RefSeq_NR | 6814 | chr6 | - | up |
| ASHG19A3A034594 | ref|NR_029411| | miscRNA | + | noncoding | LOC100133091 | RefSeq_NR | 2712 | chr7 | + | up |
| ASHG19A3A029585 | ref|NR_002936| | miscRNA | - | noncoding | TOB2P1 | Ensembl | 992 | chr6 | - | up |
| ASHG19A3A018897 | ref|NR_036473| | miscRNA | + | noncoding | SNHG3 | RefSeq_NR | 939 | chr1 | + | up |
| ASHG19A3A052923 | ref|NR_002188| | miscRNA | - | noncoding | GBAP1 | RefSeq_NR | 2036 | chr1 | - | up |
| ASHG19A3A038488 | ref|NR_003573| | miscRNA | + | noncoding | ANXA2P2 | RefSeq_NR | 1310 | chr9 | + | up |
| ASHG19A3A035831 | ref|NR_002734| | miscRNA | - | noncoding | PTTG3P | RefSeq_NR | 609 | chr8 | - | up |
| ASHG19A3A023510 | ref|XR_159343| | miscRNA | + | noncoding | RP11-230B22.1 | Ensembl | 1228 | chr1 | + | up |
| ASHG19A3A013943 | ref|NR_038942| | miscRNA | - | noncoding |  | misc_RNA | 1433 | chr2 | - | up |
| **ASHG19A3A007152** | **ref|NR_003604|** | **miscRNA** | **+** | **noncoding** | **ZFAS1** | **UCSC_knowngene** | **677** | **chr20** | **+** | **up** |
| ASHG19A3A007269 | ref|NR_024373| | miscRNA | - | noncoding | NCRNA00152 | RefSeq_NR | 518 | chr2 | + | up |
| ASHG19A3A011382 | ref|NR_038279| | miscRNA | - | noncoding | CR618332 | UCSC_knowngene | 1558 | chr19 | - | up |
| ASHG19A3A007507 | ref|XR_159165| | miscRNA | - | noncoding | LOC645166 | RefSeq_NR | 592 | chr1 | + | up |
| ASHG19A3A007506 | ref|XR_159162| | miscRNA | - | noncoding | LOC645166 | RefSeq_NR | 670 | chr1 | + | up |
| ASHG19A3A053683 | ref|NR_024348| | miscRNA | - | noncoding | NCRNA00095 | RefSeq_NR | 3951 | chr16 | - | up |
| ASHG19A3A046198 | ref|NR_038360| | miscRNA | + | noncoding | AK097654 | UCSC_knowngene | 1437 | chr11 | + | up |
| ASHG19A3A051381 | ref|NR_033240| | miscRNA | + | noncoding | LOC100129794 | RefSeq_NR | 1819 | chr14 | + | up |
| ASHG19A3A036214 | ref|NR_026785| | miscRNA | - | noncoding | C8orf51 | RefSeq_NR | 2030 | chr8 | - | up |
| ASHG19A3A000465 | ref|NR_039975| | miscRNA | - | noncoding | RP11-701P16.4 | Ensembl | 621 | chr4 | - | down |
| ASHG19A3A000162 | ref|XR_159162| | miscRNA | - | noncoding | AC027612.6 | Ensembl | 218 | chr2 | - | up |
| ASHG19A3A000043 | ref|NR_003098| | miscRNA | - | noncoding |  | NRED | 1502 | chr11 | - | up |
| ASHG19A3A031920 | ref|NR_028595| | miscRNA | + | noncoding | CCDC162 | RefSeq_NR | 715 | chr6 | + | up |
| ASHG19A3A009982 | ref|NR_027058| | miscRNA | + | noncoding | C17orf86 | RefSeq_NR | 2183 | chr17 | + | up |
| ASHG19A3A032646 | ref|NR_027768| | miscRNA | - | noncoding | AC018633.4 | Ensembl | 1724 | chr7 | - | up |
| ASHG19A3A025515 | ref|NR_024031| | miscRNA | + | noncoding | KIAA0167 | UCSC_knowngene | 824 | chr4 | + | up |
| ASHG19A3A048155 | ref|NR_033878| | miscRNA | - | noncoding | BC040060 | UCSC_knowngene | 586 | chr12 | - | up |
| ASHG19A3A015934 | ref|NR_015395| | miscRNA | - | noncoding | NCRNA00152 | Ensembl | 519 | chr2 | + | up |
| ASHG19A3A029584 | ref|NR_002936| | miscRNA | - | noncoding | LOC222699 | RefSeq_NR | 3592 | chr6 | - | up |
| ASHG19A3A013149 | ref|NR_036508| | miscRNA | + | noncoding | AK000879 | UCSC_knowngene | 2730 | chr19 | + | up |
| ASHG19A3A022598 | ref|XR_112462| | miscRNA | + | noncoding | AK127190 | UCSC_knowngene | 3447 | chr3 | + | up |
| ASHG19A3A023105 | ref|NR_038266| | miscRNA | + | noncoding | BC042384 | UCSC_knowngene | 749 | chr3 | + | up |
| ASHG19A3A038145 | ref|NR_046326| | miscRNA | + | noncoding | RP11-480I12.3 | Ensembl | 748 | chr1 | + | up |
| ASHG19A3A012605 | ref|XR_111858| | miscRNA | + | noncoding | BC024306 | UCSC_knowngene | 1289 | chr19 | + | up |
| ASHG19A3A047742 | ref|NR_038269| | miscRNA | - | noncoding | CR602022 | UCSC_knowngene | 523 | chr12 | - | up |
| ASHG19A3A040802 | ref|NR_024163| | miscRNA | + | noncoding | CKS1BP6 | Ensembl | 773 | chrX | + | up |
| ASHG19A3A040897 | ref|NR_015378| | miscRNA | + | noncoding | LOC401588 | RefSeq_NR | 1848 | chrX | + | up |
| ASHG19A3A052711 | ref|NR_038253| | miscRNA | + | noncoding |  | misc_RNA | 3662 | chr15 | + | up |
| ASHG19A3A010114 | ref|NR_033754| | miscRNA | - | noncoding |  | H-invDB | 1033 | chr18 | - | up |
| ASHG19A3A037407 | ref|NR_024443| | miscRNA | - | noncoding | AC129778.2 | Ensembl | 519 | chr9 | - | up |
| ASHG19A3A052506 | ref|NR_027001| | miscRNA | - | noncoding | DQ598270 | UCSC_knowngene | 299 | chr15 | - | up |
| ASHG19A3A035170 | ref|NR_024451| | miscRNA | + | noncoding | LOC100134229 | RefSeq_NR | 2398 | chr7 | + | up |
| ASHG19A3A010932 | ref|NR_027285| | miscRNA | - | noncoding | LQK1 | RefSeq_NR | 942 | chr1 | - | up |
| ASHG19A3A030796 | ref|NR_037593| | miscRNA | - | noncoding |  | misc_RNA | 891 | chr6 | - | up |
| ASHG19A3A030832 | ref|NR_027906| | miscRNA | - | noncoding | C6orf124 | Ensembl | 765 | chr6 | - | up |
| ASHG19A3A052066 | ref|NR_003262| | miscRNA | - | noncoding | CR599671 | UCSC_knowngene | 1147 | chr15 | - | up |
| ASHG19A3A042590 | ref|NR_024284| | miscRNA | - | noncoding | LOC220930 | RefSeq_NR | 2232 | chr10 | - | up |
| ASHG19A3A044929 | ref|NR_036539| | miscRNA | - | noncoding |  | misc_RNA | 1161 | chr11 | - | up |
| ASHG19A3A049662 | ref|NR_002935| | miscRNA | + | noncoding | RP11-505F3.4 | Ensembl | 408 | chr13 | - | up |
| ASHG19A3A028049 | ref|XR_159162| | miscRNA | - | noncoding | LOC729862 | UCSC_knowngene | 444 | chr5 | + | up |
| ASHG19A3A014204 | ref|NR_024373| | miscRNA | - | noncoding | LOC541471 | RefSeq_NR | 557 | chr2 | - | up |
| ASHG19A3A050816 | ref|NR_027123| | miscRNA | - | noncoding | C14orf33 | RefSeq_NR | 1512 | chr14 | - | up |
| ASHG19A3A014000 | ref|XR_159165| | miscRNA | - | noncoding | LOC654342 | RefSeq_NR | 613 | chr2 | - | up |
| ASHG19A3A033057 | ref|NR_003262| | miscRNA | - | noncoding | AC005522.8 | Ensembl | 897 | chr7 | - | up |
| ASHG19A3A023766 | ref|NR_034088| | miscRNA | + | noncoding | AC139666.1 | Ensembl | 1828 | chr3 | + | down |
| ASHG19A3A055309 | ref|NR_003669| | miscRNA | + | noncoding | MTE | UCSC_knowngene | 242 | chr16 | + | down |

**Supporting Table.S3. Core lncRNAs in the co-expression network analysis.**

| **GeneSymbol** | **Type** | **Description_Co_Exp_**  **Net-Cancer-Degree** | **Degree_**  **Cancer** | **K-core_**  **Cancer** | **Degree_**  **Normal** | **K-core_**  **Normal** | **Dif-**  **Degree** | **Dif-K-core** |
| --- | --- | --- | --- | --- | --- | --- | --- | --- |
| FABP5P3 | LncRNA | Putative fatty acid-binding protein 5-like protein 3 | 46 | 24 | 0 | 0 | 22 | 24 |
| LOC100996732 | LncRNA | uncharacterized LOC100996732 | 39 | 24 | 7 | 7 | 15 | 17 |
| LOC100996735 | LncRNA | uncharacterized LOC100996735 | 41 | 24 | 13 | 12 | 17 | 12 |
| GAS5 | LncRNA | growth arrest-specific 5 (non-protein coding) | 20 | 15 | 11 | 7 | 5 | 8 |
| PTTG3P | LncRNA |  | 16 | 8 | 0 | 0 | 8 | 8 |
| LOC728485 | LncRNA | uncharacterized LOC728485 | 6 | 5 | 0 | 0 | 1 | 5 |
| ANXA2P2 | LncRNA | Putative annexin A2-like protein | 3 | 3 | 0 | 0 | 0 | 3 |
| RP11-230B22.1 | LncRNA |  | 3 | 3 | 0 | 0 | 0 | 3 |
| MLLT4-AS1 | LncRNA | MLLT4 antisense RNA 1 (head to head) | 3 | 3 | 1 | 1 | 0 | 2 |
| LOC100128398 | LncRNA | uncharacterized LOC100128398 | 3 | 2 | 0 | 0 | 1 | 2 |
| CAHM | LncRNA | colon adenocarcinoma hypermethylated (non-protein coding) | 5 | 3 | 2 | 2 | 2 | 1 |
| PRKAR2A-AS1 | LncRNA | PRKAR2A antisense RNA 1 | 1 | 1 | 0 | 0 | 0 | 1 |
| GATS | LncRNA | GATS, stromal antigen 3 opposite strand | 1 | 1 | 0 | 0 | 0 | 1 |
| FDPSP2 | LncRNA | farnesyl diphosphate synthase pseudogene 2 | 1 | 1 | 0 | 0 | 0 | 1 |
| CBX3P2 | LncRNA | chromobox homolog 3 pseudogene 2 | 1 | 1 | 0 | 0 | 0 | 1 |
| LOC644656 | LncRNA | uncharacterized LOC644656 | 2 | 2 | 32 | 16 | 0 | -14 |
| TOB2P1 | LncRNA | transducer of ERBB2, 2 pseudogene 1 | 2 | 2 | 3 | 2 | 0 | 0 |
| SLC25A21-AS1 | LncRNA |  | 1 | 1 | 1 | 1 | 0 | 0 |
| FLVCR1-AS1 | LncRNA | FLVCR1 antisense RNA 1 (head to head) | 1 | 1 | 1 | 1 | 0 | 0 |
| ZNF674-AS1 | LncRNA | ZNF674 antisense RNA 1 (head to head) | 3 | 2 | 3 | 3 | 1 | -1 |
| LINC01093 | LncRNA |  | 3 | 2 | 4 | 3 | 1 | -1 |
| LINC00338 | LncRNA | long intergenic non-protein coding RNA 338 | 2 | 2 | 4 | 3 | 0 | -1 |
| LINC00665 | LncRNA | long intergenic non-protein coding RNA 665 | 1 | 1 | 3 | 3 | 0 | -2 |
| JHDM1D-AS1 | LncRNA |  | 1 | 1 | 3 | 3 | 0 | -2 |
| LINC00885 | LncRNA |  | 1 | 1 | 3 | 3 | 0 | -2 |
| SPTY2D1-AS1 | LncRNA | SPTY2D1 antisense RNA 1 | 2 | 2 | 7 | 5 | 0 | -3 |
| AURKAPS1 | LncRNA | aurora kinase A pseudogene 1 | 3 | 2 | 5 | 5 | 1 | -3 |
| DANCR | LncRNA | differentiation antagonizing non-protein coding RNA | 1 | 1 | 4 | 4 | 0 | -3 |
| LOC100133920 | LncRNA | uncharacterized LOC100133920 | 0 | 0 | 3 | 3 | 0 | -3 |
| TATDN1 | LncRNA | TatD DNase domain containing 1 | 8 | 7 | 17 | 12 | 1 | -5 |
| MYLK-AS1 | LncRNA | MYLK antisense RNA 1 | 2 | 2 | 8 | 7 | 0 | -5 |
| FBXL19-AS1 | LncRNA | FBXL19 antisense RNA 1 (head to head) | 3 | 2 | 8 | 7 | 1 | -5 |
| PCAT6 | LncRNA |  | 0 | 0 | 5 | 5 | 0 | -5 |
| KTN1-AS1 | LncRNA | KTN1 antisense RNA 1 | 1 | 1 | 12 | 8 | 0 | -7 |
| LINC00944 | LncRNA |  | 0 | 0 | 9 | 7 | 0 | -7 |
| LOC100630918 | LncRNA | uncharacterized LOC100630918 | 3 | 3 | 25 | 15 | 0 | -12 |
| ANXA2P3 | LncRNA | annexin A2 pseudogene 3 | 6 | 3 | 23 | 15 | 3 | -12 |
| MT1IP | LncRNA | metallothionein 1I, pseudogene | 3 | 3 | 26 | 16 | 0 | -13 |
| GBAP1 | LncRNA | glucosidase, beta, acid pseudogene 1 | 1 | 1 | 17 | 14 | 0 | -13 |
| DPY19L2P2 | LncRNA | dpy-19-like 2 pseudogene 2 (C. elegans) | 2 | 2 | 31 | 16 | 0 | -14 |
| ZFAS1 | LncRNA | ZNFX1 antisense RNA 1 | 5 | 5 | 6 | 5 | 0 | -16 |
| ZEB1-AS1 | LncRNA | ZEB1 antisense RNA 1 | 0 | 0 | 35 | 16 | 0 | -16 |
